# Supplementary material for: Role of the pre-initiation complex in Mediator recruitment and dynamics
Source: eLife. 2018 Dec 12;7:e39633. doi: 10.7554/eLife.39633 (PMC6322861; doi:10.7554/eLife.39633)
Supplement: Supplementary file 1. [file elife-39633-supp1.xlsx]

## Sheet: Strains
Supplementary file 1. Yeast strains used in this study.
Name	Description	Genotype	Source
yFR1321	Parent AA	MATα ade2-1 trp1-1 can1-100 leu2-3, 112, his3-11, 15, ura3 tor1-1 fpr1::NAT, RPL13A-2xFKBP12::TRP1	(Jeronimo et al., 2014) Gift from F. Robert
RMY1321-G	Parent AA med15-myc	mat alpha ade2-1,his3-11,15, leu2-3,112, trp1-1, ura3-1, can1-100 tor1-1 fpr1::NAT RPL13A-2xFKPB12::TRP1 Gal11-13myc::skHIS3	This study
EKY25	taf1-AA	MATα ade2-1 trp1-1 can1-100 leu2-3, 112, his3-11, 15, ura3 tor1-1 fpr1::NAT, RPL13A-2xFKBP12::TRP1 TAF1-FRB::KanMX6	This study
EKY26	taf1-AA med18-myc	MATα ade2-1 trp1-1 can1-100 leu2-3, 112, his3-11, 15, ura3 tor1-1 fpr1::NAT RPL13A-2xFKBP12::TRP1, TAF1-FRB::KanMX6 MED18-13MYC::HIS3 (S.k.)	This study
EKY27	taf1-AA med15-myc	MATα ade2-1 trp1-1 can1-100 leu2-3, 112, his3-11, 15, ura3 tor1-1 fpr1::NAT RPL13A-2xFKBP12::TRP1, TAF1-FRB::KanMX6 MED15-13MYC::HIS3 (S.k.)	This study
EKY8	tbp-AA	MATα ade2-1 trp1-1 can1-100 leu2-3, 112, his3-11, 15, ura3 tor1-1 fpr1::NAT RPL13A-2xFKBP12::TRP1 TBP-FRB::KanMX6	This study
EKY9	tbp-AA med15-myc	MATα ade2-1 trp1-1 can1-100 leu2-3, 112, his3-11, 15, ura3 tor1-1 fpr1::NAT, RPL13A-2xFKBP12::TRP1 TBP-FRB::KanMX6 MED18-13MYC::HIS3 (S.k.)	This study
EKY10	tbp-AA med18-myc	MATα ade2-1 trp1-1 can1-100 leu2-3, 112, his3-11, 15, ura3 tor1-1 fpr1::NAT RPL13A-2xFKBP12::TRP1 TBP-FRB::KanMX6 MED15-13MYC::HIS3 (S.k.)	This study
EKY11	tbp-AA med2-TAP	MATα ade2-1 trp1-1 can1-100 leu2-3, 112, his3-11, 15, ura3 tor1-1 fpr1::NAT RPL13A-2xFKBP12::TRP1 TBP-FRB::KanMX6 MED2-TAP::HIS3	This study
EKY12	tbp-AA med14-TAP	MATα ade2-1 trp1-1 can1-100 leu2-3, 112, his3-11, 15, ura3 tor1-1 fpr1::NAT RPL13A-2xFKBP12::TRP1 TBP-FRB::KanMX6 MED14-TAP::HIS3	This study
EKY13	rpb3-AA	MATα ade2-1 trp1-1 can1-100 leu2-3, 112, his3-11, 15, ura3 tor1-1 fpr1::NAT RPL13A-2xFKBP12::TRP1 RPB3-FRB::KanMX6	This study
EKY14	rpb3-AA med18-myc	MATα ade2-1 trp1-1 can1-100 leu2-3, 112, his3-11, 15, ura3 tor1-1 fpr1::NAT RPL13A-2xFKBP12::TRP1 RPB3-FRB::KanMX6 MED18-13MYC::HIS3 (S.k.)	This study
EKY15	rpb3-AA med15-myc	MATα ade2-1 trp1-1 can1-100 leu2-3, 112, his3-11, 15, ura3 tor1-1 fpr1::NAT RPL13A-2xFKBP12::TRP1 RPB3-FRB::KanMX6 MED15-13MYC::HIS3 (S.k.)	This study
EKY16	rpb3-AA med2-TAP	MATα ade2-1 trp1-1 can1-100 leu2-3, 112, his3-11, 15, ura3 tor1-1 fpr1::NAT RPL13A-2xFKBP12::TRP1 RPB3-FRB::KanMX6 MED2-TAP::HIS3	This study
EKY17	rpb3-AA med14-TAP	MATα ade2-1 trp1-1 can1-100, leu2-3, 112, his3-11, 15, ura3 tor1-1 fpr1::NAT RPL13A-2xFKBP12::TRP1 RPB3-FRB::KanMX6 MED14-TAP::HIS3	This study
KHW127	kin28-AA	MATα ade2-1 trp1-1 can1-100 leu2-3, 112, his3-11, 15, ura3 tor1-1 fpr1::NAT RPL13A-2xFKBP12::TRP1 KIN28-FRB::HIS3	(Wong et al., 2014) Gift from K. Struhl
EKY18	kin28-AA med18-myc	MATα ade2-1 trp1-1 can1-100 leu2-3, 112, his3-11, 15, ura3 tor1-1 fpr1::NAT RPL13A-2xFKBP12::TRP1 KIN28-FRB::HIS3 MED18-18MYC::klURA3	This study
TBY128	kin28-AA med15-myc	MATα ade2-1 trp1-1 can1-100 leu2-3, 112, his3-11, 15, ura3 tor1-1 fpr1::NAT RPL13A-2xFKBP12::TRP1 KIN28-FRB::HIS3 MED15-18MYC::klURA3	This study
TBY129	kin28-AA med17-myc	MATα ade2-1 trp1-1 can1-100 leu2-3, 112 his3-11, 15 ura3 tor1-1 fpr1::NAT RPL13A-2xFKBP12::TRP1 KIN28-FRB::HIS3 MED17-9MYC::TRP1	This study
EKY19	kin28-taf1-AA med18-myc	ade2-1 trp1-1 can1-100 leu2-3, 112, his3-11, 15, ura3 tor1-1 fpr1::NAT RPL13A-2xFKBP12::TRP1 KIN28-FRB::HIS3 TAF1-FRB::KanMX MED18-13MYC::HIS3 (S.k.)	This study
EKY20	kin28-taf1-AA med15-myc	ade2-1 trp1-1 can1-100 leu2-3, 112, his3-11, 15, ura3 tor1-1 fpr1::NAT RPL13A-2xFKBP12::TRP1 KIN28-FRB::HIS3 TAF1-FRB::KanMX MED15-13MYC::HIS3 (S.k.)	This study
RMY1329	kin28-tbp-AA	MATα ade2-1 trp1-1 can1-100 leu2-3, 112 his3-11, 15 ura3 tor1-1 fpr1::NAT RPL13A-2xFKBP12::TRP1 KIN28-FRB-EGFP::hph TBP-FRB::KanMX	This study
EKY21	kin28-tbp-AA med18-myc	MATα ade2-1 trp1-1 can1-100 leu2-3, 112, his3-11, 15, ura3 tor1-1 fpr1::NAT RPL13A-2xFKBP12::TRP1 KIN28-FRB-EGFP::hph TBP-FRB::KanMX MED18-13MYC::HIS3 (S.k.)	This study
EKY22	kin28-tbp-AA med15-myc	MATα ade2-1 trp1-1 can1-100 leu2-3, 112, his3-11, 15, ura3 tor1-1 fpr1::NAT RPL13A-2xFKBP12::TRP1 KIN28-FRB-EGFP::hph TBP-FRB::KanMX MED15-13MYC::HIS3 (S.k.)	This study
RMY1330	kin28-tbp-AA med17-myc	MATα ade2-1 trp1-1 can1-100 leu2-3, 112 his3-11, 15 ura3 tor1-1 fpr1::NAT RPL13A-2xFKBP12::TRP1 KIN28-FRB-EGFP::hph TBP-FRB::KanMX srb4-13myc::URA3	This study
RMY1331	kin28-tbp-AA med2-TAP	MATα ade2-1 trp1-1 can1-100 leu2-3, 112 his3-11, 15 ura3 tor1-1 fpr1::NAT RPL13A-2xFKBP12::TRP1 KIN28-FRB-EGFP::hph TBP-FRB::KanMX Med2-TAP::klHIS3	This study
EKY23	kin28-rpb3-AA med18-myc	ade2-1 trp1-1 can1-100 leu2-3, 112, his3-11, 15, ura3 tor1-1 fpr1::NAT RPL13A-2xFKBP12::TRP1 KIN28-FRB::HIS3 RPB3-FRB::KanMX MED18-13MYC::HIS3 (S.k.)	This study
EKY24	kin28-rpb3-AA med15-myc	ade2-1 trp1-1 can1-100 leu2-3, 112, his3-11, 15, ura3 tor1-1 fpr1::NAT RPL13A-2xFKBP12::TRP1 KIN28-FRB::HIS3 RPB3-FRB::KanMX MED15-13MYC::HIS3 (S.k.)	This study
BY4741	Parent strain for tail deletion mutants	MATa his3Δ1 leu2Δ0 met15Δ0 ura3Δ0	This study
LS01	med2∆	Mat a med2::KanMX his3∆1 leu2∆0 met15∆0 ura3∆0	Zhang et al., 2004
LS01H	med2∆	Mat a med2::KanMX leu2∆0 met15∆0 ura3∆0	This study
LS10	med3∆ med15∆	Mat alpha med3::KanMX med15::KanMX his3∆1 leu2∆0 lys2∆0 met15∆0 ura3∆0	Zhang et al., 2004
RMY1002-A5D	med2∆ med3∆ med15∆ segregant	MATa med2::KanMX med3::KanMX med15::KanMX leu2Δ0 met15Δ0 ura3Δ0	This study
RMY1002-C1D	med2∆ med3∆ med15∆ segregant	MATa med2::KanMX med3::KanMX med15::KanMX leu2Δ0 met15Δ0 ura3Δ0	This study
RMY1009-A5D	med2∆ med3∆ med15∆ kin28-AA	MATa med2::KanMX med3::KanMX med15::KanMX leu2Δ0 met15Δ0 ura3Δ0 tor1-1 fpr1::NAT RPL13A-2xFKBP12::TRP1 KIN28-FRB-EGFP::hph	This study
RMY1010-A5D	med2∆ med3∆ med15∆ kin28-AA Med17-myc	MATa med2::KanMX med3::KanMX med15::KanMX leu2Δ0 met15Δ0 ura3Δ0 tor1-1 fpr1::NAT RPL13A-2xFKBP12::TRP1 KIN28-FRB-EGFP::hph MED17-9MYC::TRP1	This study
FWP510	S. pombe for spike-in	S. pombe h- ade6-210 leu1-32 ura4-D18 swd1+::13myc-KanMX	DeGennaro et al. 2013; gift from F. Winston

## Sheet: Primers
Table S2. Primers used in this study. Related to Figures 1-5..
Gene-specific qPCR
Primer name	Orientation	Position	Sequence 5' to 3'
ChrV-up	Sense	Telomeric region	GGC TGT CAG AAT ATG GGG CCG TAG TA
ChrV-down	Antisense		CAC CCC GAA GCT GCT TTC ACA ATA C
SNR6-1fcr	Sense	Coding region of a Pol III-reg gene	TTC GCG AAG TAA CCC TTC GTG GA
SNR6-1rcr	Antisense		GTA AAA CGG TTC ATC CTT ATG CAG
NtRNAq-1f	Sense	Coding region of tQ(UUG)C	AAT CTG TAT TCA AAA AAA GGT CCT ACC
NtRNAq-1r	Antisense		AAT ATT ACA AGA AGT CCT GGT CCT ATA
PIK1-fe	Sense	-134 to -111	GTC TCT TTG GTG CTT CCT GGA TAT
PIK1-re	Antisense	+70 to +47	AGG CAG CTC TCT TTC TTG GCA AGA
RPL12A-cf	Sense	-97 to -74	CAA GGC TTC TTT GAG TTA CAG TTC
RPL12A-cr	Antisense	+100 to +77	GAC CAA TCT TTG GAG CCA AAG CAG
PDC1-fe	Sense	-122 to -99	CTC TCC TTG CAA TCA GAT TTG GGT
PDC1-re	Antisense	+81 to +58	ACC TGG CAA ACC GAA AAC GGT GTT
TEF2-cf	Sense	+27 to +50	CGT TGT CGT TAT CGG TCA TGT CGA
TEF2-cr	Antisense	+174 to +151	CCA AGC GTA CTT GAA AGA ACC CTT
Cloning
Primer name	Orientation	Description	Sequence 5' to 3'
Taf1-F	Sense	Generating Taf1-FRB::KanMX	TCT TGT CCA ATG TAT AGC AGT AAA GAT AAC CCT GCT TCA CCA AAG CGG ATC CCC GGG TTA ATT AA
Taf1-R	Antisense		ACC TTT ACA AAA GTT TTA TTC GAT CAA TAC ATC GTT ATA CTG AAT GAA TTC GAG CTC GTT TAA AC
Rpb3-FRB-R1	Sense	Generating Rpb3-FRB::KanMX	CAA ATG GGT AAT ACT GGA TCA GGA GGG TAT GAT AAT GCT TGG CGG ATC CCC GGG TTA ATT AA
Rpb3-FRB-F2	Antisense		GTT CAC TTG TTT TTT TTC CTC TAT TAC GCC CAC TTG AGA AGA ATT CGA GCT CGT TTA AAC
TBP-FRB-F	Sense	Generating TBP-FRB::KanMX	GCT TTT GAA GCT ATA TAC CCT GTG CTA AGT GAA TTT AGA AAA ATG CGG ATC CCC GGG TTA ATT AA
TBP-FRB-R	Antisense		GAA CAA ATA GAA AAC CTT TTT TTC TTT TCG TCT ACT CCT TCC CCA GAA TTC GAG CTC GTT TAA AC
Kin28-aaf	Sense	Generating Kin28-FRB-EGFP::hph	ACC ACC ACC AAG TGA CCC GTC TTC AAT AAA AAT ACG TAA CCG GAT CCC CGG GTT AAT TAA
Kin28-aaR	Antisense		ATG TCA ATA ACA CAG ATT CTA CAA ATT TTA TAA AAT CAT AGA ATT CGA GCT CGT TTA AAC
Kin28-2F	Sense	Amplification of Kin28-FRB::HIS3	GTG TTA TGA TGT GAA GCT TCA TT
Kin28-2R	Antisense		CTG ACA AAC CTC TGC ATA TTT TAG
Srb5-F	Sense	Amplification of Med18-myc::HIS3	TTG CGT TCA TTT TAG CTT GCA GGT
Srb5-R	Antisense		TCC TCG GTA TAG CAA CAT TAG ATA
Gall11-MycF	Sense	Amplification of Med15-myc::HIS3	AGA AGT ACT TCC ACG ACA TTG CTA
Gal11-MycR	Antisense		TTC TGG AGT TAA AAA AGAG TTT G
Med2-TAP-F	Sense	Amplification of Med2-TAP::HIS3	ATT TTG AAG GCG GAT CCT CCC AAA TAA ACT GCC CGT CTG AAA GTA
Med2-TAP-R	Antisense		CAC ACC ACG GTT TAC AAG TCA ATA GTT AAC AAT AGG AAG ACG AAG
RGR1-TAP-F	Sense	Amplification of Med14-TAP::HIS3	GAG TTA AAA AGT GGC AGG AAA GTA TAG GGT TTT CTT GGC TGG GCA
RGR1-TAP-R	Antisense		TAC AAT CTC CTA AGG GAT AGT AGC GCC GGT GAC ATT TTA TTC GCT
Srb4-1	Sense	Amplification of Med17-myc::TRP1	GTG TGT TAC TTT CTA CAT TCA TAG ACG G
Srb4-2	Antisense		GGC AAT GTT ATT AAA TCC TTC ATA TTC
