# Supplementary material for: Role of the pre-initiation complex in Mediator recruitment and dynamics
Source: eLife. 2018 Dec 12;7:e39633. doi: 10.7554/eLife.39633 (PMC6322861; doi:10.7554/eLife.39633)
Supplement: Supplementary file 2. [file elife-39633-supp2.xlsx]

## Sheet: Sheet1
Supplementary file 2.
Primers used in this study
Gene-specific qPCR
Primer name	Orientation	Position	Sequence 5' to 3'
ChrV-up	Sense	Telomeric region	GGC TGT CAG AAT ATG GGG CCG TAG TA
ChrV-down	Antisense		CAC CCC GAA GCT GCT TTC ACA ATA C
SNR6-1fcr	Sense	Coding region of a Pol III-reg gene	TTC GCG AAG TAA CCC TTC GTG GA
SNR6-1rcr	Antisense		GTA AAA CGG TTC ATC CTT ATG CAG
NtRNAq-1f	Sense	Coding region of tQ(UUG)C	AAT CTG TAT TCA AAA AAA GGT CCT ACC
NtRNAq-1r	Antisense		AAT ATT ACA AGA AGT CCT GGT CCT ATA
PIK1-fe	Sense	-134 to -111	GTC TCT TTG GTG CTT CCT GGA TAT
PIK1-re	Antisense	+70 to +47	AGG CAG CTC TCT TTC TTG GCA AGA
RPL12A-cf	Sense	-97 to -74	CAA GGC TTC TTT GAG TTA CAG TTC
RPL12A-cr	Antisense	+100 to +77	GAC CAA TCT TTG GAG CCA AAG CAG
PDC1-fe	Sense	-122 to -99	CTC TCC TTG CAA TCA GAT TTG GGT
PDC1-re	Antisense	+81 to +58	ACC TGG CAA ACC GAA AAC GGT GTT
TEF2-cf	Sense	+27 to +50	CGT TGT CGT TAT CGG TCA TGT CGA
TEF2-cr	Antisense	+174 to +151	CCA AGC GTA CTT GAA AGA ACC CTT
Cloning
Primer name	Orientation	Description	Sequence 5' to 3'
Taf1-F	Sense	Generating Taf1-FRB::KanMX	TCT TGT CCA ATG TAT AGC AGT AAA GAT AAC CCT GCT TCA CCA AAG CGG ATC CCC GGG TTA ATT AA
Taf1-R	Antisense		ACC TTT ACA AAA GTT TTA TTC GAT CAA TAC ATC GTT ATA CTG AAT GAA TTC GAG CTC GTT TAA AC
Rpb3-FRB-R1	Sense	Generating Rpb3-FRB::KanMX	CAA ATG GGT AAT ACT GGA TCA GGA GGG TAT GAT AAT GCT TGG CGG ATC CCC GGG TTA ATT AA
Rpb3-FRB-F2	Antisense		GTT CAC TTG TTT TTT TTC CTC TAT TAC GCC CAC TTG AGA AGA ATT CGA GCT CGT TTA AAC
TBP-FRB-F	Sense	Generating TBP-FRB::KanMX	GCT TTT GAA GCT ATA TAC CCT GTG CTA AGT GAA TTT AGA AAA ATG CGG ATC CCC GGG TTA ATT AA
TBP-FRB-R	Antisense		GAA CAA ATA GAA AAC CTT TTT TTC TTT TCG TCT ACT CCT TCC CCA GAA TTC GAG CTC GTT TAA AC
Kin28-aaf	Sense	Generating Kin28-FRB-EGFP::hph	ACC ACC ACC AAG TGA CCC GTC TTC AAT AAA AAT ACG TAA CCG GAT CCC CGG GTT AAT TAA
Kin28-aaR	Antisense		ATG TCA ATA ACA CAG ATT CTA CAA ATT TTA TAA AAT CAT AGA ATT CGA GCT CGT TTA AAC
Kin28-2F	Sense	Amplification of Kin28-FRB::HIS3	GTG TTA TGA TGT GAA GCT TCA TT
Kin28-2R	Antisense		CTG ACA AAC CTC TGC ATA TTT TAG
Srb5-F	Sense	Amplification of Med18-myc::HIS3	TTG CGT TCA TTT TAG CTT GCA GGT
Srb5-R	Antisense		TCC TCG GTA TAG CAA CAT TAG ATA
Gall11-MycF	Sense	Amplification of Med15-myc::HIS3	AGA AGT ACT TCC ACG ACA TTG CTA
Gal11-MycR	Antisense		TTC TGG AGT TAA AAA AGAG TTT G
Med2-TAP-F	Sense	Amplification of Med2-TAP::HIS3	ATT TTG AAG GCG GAT CCT CCC AAA TAA ACT GCC CGT CTG AAA GTA
Med2-TAP-R	Antisense		CAC ACC ACG GTT TAC AAG TCA ATA GTT AAC AAT AGG AAG ACG AAG
RGR1-TAP-F	Sense	Amplification of Med14-TAP::HIS3	GAG TTA AAA AGT GGC AGG AAA GTA TAG GGT TTT CTT GGC TGG GCA
RGR1-TAP-R	Antisense		TAC AAT CTC CTA AGG GAT AGT AGC GCC GGT GAC ATT TTA TTC GCT
Srb4-1	Sense	Amplification of Med17-myc::TRP1	GTG TGT TAC TTT CTA CAT TCA TAG ACG G
Srb4-2	Antisense		GGC AAT GTT ATT AAA TCC TTC ATA TTC
