# Supplementary material for: Role of the pre-initiation complex in Mediator recruitment and dynamics
Source: eLife. 2018 Dec 12;7:e39633. doi: 10.7554/eLife.39633 (PMC6322861; doi:10.7554/eLife.39633)
Supplement: Supplementary file 3. [file elife-39633-supp3.xlsx]

## Sheet: Sheet1
Supplementary file 3. Summary of RNA-seq and ChIP-seq experiments
Experiment	Yeast strain	Description	RNA or ChIP target	Date
RNA-seq on med2∆ med3∆ med15∆ vs wt	BY4741 (wt)	WT	RNA	2016-03-01
	BY4741 (wt)	WT	RNA	2016-09-01
	RMY1002-A5D	med2∆ med3∆ med15∆	RNA	2016-09-01
	RMY1002-C1D	med2∆ med3∆ med15∆	RNA	2016-09-01
Untagged controls	KHW127	kin28-AA	myc	2016-09-01
	KHW127	kin28-AA plus rapamycin	myc	2018-01-18
	EKY13	rpb3-AA plus rapamycin	myc	2016-09-01
Input	KHW127	kin28-AA	none	2016-10-01
	KHW127	kin28-AA	none	2016-10-01
ChIP-seq on med2∆ med3∆ med15∆ vs wt	TBY129	kin28-AA plus rapamycin	Med17	2016-12-01
	TBY129	kin28-AA plus rapamycin	Med17	2016-10-01
	TBY129	kin28-AA plus rapamycin	Med17	2017-05-01
	RMY1010-A5D	med2∆ med3∆ med15∆ kin28-AA plus rapa	Med17	2017-02-01
	RMY1010-A5D	med2∆ med3∆ med15∆ kin28-AA plus rapa	Med17	2017-05-01
	BY4741	WT with S. pombe spike-in	Rpb1	2018-03-01
	BY4741	WT with S. pombe spike-in	Rpb1	2018-06-01
	RMY1002-A5D	med2∆ med3∆ med15∆ with S. pombe spike-in	Rpb1	2018-03-01
	RMY1002-A5D	med2∆ med3∆ med15∆ with S. pombe spike-in	Rpb1	2018-06-01
	RMY1010-A5D	kin28-AA med2∆ med3∆ med15∆ plus rapa	Rpb1	2017-02-01
	KHW127	kin28-AA plus rapa	Rpb1	2016-10-01
PIC anchor away
No FRB tag control	RMY1321-G	Parent AA Med15-myc	Med15	2018-03-01
TBP anchor away	EKY9	tbp-AA Med18-myc	Med18	2016-03-01
	EKY9	tbp-AA Med18-myc	Med18	2016-06-01
	EKY9	tbp-AA Med18-myc	Med18	2018-06-01
	EKY9	tbp-AA Med18-myc plus rapamycin	Med18	2016-03-01
	EKY9	tbp-AA Med18-myc plus rapamycin	Med18	2016-06-01
	EKY9	tbp-AA Med18-myc plus rapamycin	Med18	2018-06-01
	EKY10	tbp-AA Med15-myc	Med15	2016-03-01
	EKY10	tbp-AA Med15-myc	Med15	2016-06-01
	EKY10	tbp-AA Med15-myc	Med15	2018-06-01
	EKY10	tbp-AA Med15-myc plus rapamycin	Med15	2016-03-01
	EKY10	tbp-AA Med15-myc plus rapamycin	Med15	2016-06-01
	EKY10	tbp-AA Med15-myc plus rapamycin	Med15	2018-06-01
	EKY11	tbp-AA Med2-TAP	Med2	2016-12-01
	EKY11	tbp-AA Med2-TAP plus rapamycin	Med2	2016-12-01
	EKY12	tbp-AA Med14-TAP	Med14	2016-12-01
	EKY12	tbp-AA Med14-TAP plus rapamycin	Med14	2016-12-01
	EKY8	tbp-AA	Rpb1 (8WG16)	2016-06-01
	EKY8	tbp-AA plus rapamycin	Rpb1 (8WG16)	2016-06-01
	EKY8	tbp-AA	Taf1	2018-02-01
	EKY8	tbp-AA plus rapamycin	Taf1	2018-02-01
	EKY8	tbp-AA	TBP	2016-03-01
	EKY8	tbp-AA plus rapamycin	TBP	2016-03-01
	EKY8	tbp-AA	TBP	2016-10-01
	EKY8	tbp-AA plus rapamycin	TBP	2016-10-01
Rpb3 anchor away	EKY14	rpb3-AA; Med18-myc	Med18	2016-03-01
	EKY14	rpb3-AA; Med18-myc	Med18	2016-06-01
	EKY14	rpb3-AA; Med18-myc plus rapamycin	Med18	2016-03-01
	EKY14	rpb3-AA; Med18-myc plus rapamycin	Med18	2016-06-01
	EKY15	rpb3-AA; Med15-myc	Med15	2016-03-01
	EKY15	rpb3-AA; Med15-myc	Med15	2016-06-01
	EKY15	rpb3-AA; Med15-myc plus rapamycin	Med15	2016-03-01
	EKY15	rpb3-AA; Med15-myc plus rapamycin	Med15	2016-06-01
	EKY16	rpb3-AA Med2-TAP	Med2	2016-12-01
	EKY16	rpb3-AA Med2-TAP plus rapamycin	Med2	2016-12-01
	EKY17	rpb3-AA Med14-TAP	Med14	2016-12-01
	EKY17	rpb3-AA Med14-TAP plus rapamycin	Med14	2016-12-01
	EKY13	rpb3-AA	Rpb3	2016-03-01
	EKY13	rpb3-AA	Rpb1	2016-06-01
	EKY13	rpb3-AA plus rapamycin	Rpb3	2016-03-01
	EKY13	rpb3-AA plus rapamycin	Rpb1	2016-06-01
	EKY13	rpb3-AA	Taf1	2018-01-18
	EKY13	rpb3-AA plus rapamycin	Taf1	2018-01-18
	EKY13	rpb3-AA	TBP	2018-01-18
	EKY13	rpb3-AA plus rapamycin	TBP	2018-01-18
Taf1 anchor away	EKY25	taf1-AA	Taf1	2016-03-01
	EKY25	taf1-AA plus rapamycin	Taf1	2016-03-01
	EKY25	taf1-AA	Taf1	2016-04-01
	EKY25	taf1-AA plus rapamycin	Taf1	2016-04-01
	EKY26	taf1-AA	Med18	2016-04-01
	EKY26	taf1-AA plus rapamycin	Med18	2016-04-01
	EKY27	taf1-AA	Med15	2016-03-01
	EKY27	taf1-AA plus rapamycin	Med15	2016-03-01
	EKY27	taf1-AA	Med15	2016-04-01
	EKY27	taf1-AA plus rapamycin	Med15	2016-04-01
Kin28-PIC anchor away
Kin28 anchor away	EKY18	kin28-AA plus rapamycin	Med18	2016-10-01
	EKY18	kin28-AA plus rapamycin	Med18	2017-01-01
	EKY18	kin28-AA plus rapamycin	Med18	2017-10-01
	EKY18	kin28-AA plus rapamycin	Med18	2018-04-01
	EKY18	kin28-AA plus rapamycin	Med18	2018-08-01
	TBY128	kin28-AA plus rapamycin	Med15	2016-10-01
	TBY128	kin28-AA plus rapamycin	Med15	2016-12-01
	TBY128	kin28-AA plus rapamycin	Med15	2018-09-01
	KHW127	kin28-AA plus rapamycin	Rpb1 (8WG16)	2016-12-01
	KHW127	kin28-AA plus rapamycin	Rpb1 (8WG16)	2016-10-01
Kin28-TBP anchor away	EKY21	kin28-tbp-AA Med18-myc plus rapamycin	Med18	2016-10-01
	EKY21	kin28-tbp-AA Med18-myc plus rapamycin	Med18	2016-12-01
	EKY21	kin28-tbp-AA Med18-myc plus rapamycin	Med18	2017-01-01
	EKY21	kin28-tbp-AA Med18-myc plus rapamycin	Med18	2017-01-01
	EKY22	kin28-tbp-AA Med15-myc plus rapamycin	Med15	2016-10-01
	EKY22	kin28-tbp-AA Med15-myc plus rapamycin	Med15	2017-01-01
	EKY22	kin28-tbp-AA Med15-myc plus rapamycin	Med15	2017-01-01
	EKY22	kin28-tbp-AA Med15-myc plus rapamycin	Med15	2016-12-01
	EKY22	kin28-tbp-AA Med15-myc plus rapamycin	Med15	2018-08-01
	RMY1331	kin28-tbp-AA Med2-TAP plus rapamycin	Med2	2018-03-01
	RMY1331	kin28-tbp-AA Med2-TAP plus rapamycin	Med2	2018-03-01
	RMY1330	kin28-tbp-AA Med17-myc plus rapamycin	Med17	2018-03-01
	RMY1329	kin28-tbp-AA	Taf1	2018-03-01
	RMY1329	kin28-tbp-AA plus rapamycin	Taf1	2018-03-01
	RMY1329	kin28-tbp-AA	Rpb1	2018-03-01
	RMY1329	kin28-tbp-AA plus rapamycin	Rpb1	2018-03-01
	EKY22	kin28-tbp-AA plus rapamycin	Rpb1	2016-12-01
	EKY22	kin28-tbp-AA plus rapamycin	Rpb1	2017-01-01
	EKY22	kin28-tbp-AA plus rapamycin	Rpb1	2017-01-01
	EKY22	kin28-tbp-AA plus rapamycin	Rpb1	2016-10-01
Kin28-Taf1 anchor away	EKY19	kin28-taf1-AA plus rapamycin	Med18	2016-09-01
	EKY19	kin28-taf1-AA plus rapamycin	Med18	2017-10-01
	EKY19	kin28-taf1-AA plus rapamycin	Med18	2018-04-01
	EKY20	kin28-taf1-AA plus rapamycin	Med15	2016-09-01
	EKY20	kin28-taf1-AA plus rapamycin	Med15	2018-08-01
	EKY20	kin28-taf1-AA plus rapamycin	Med15	2018-09-01
	EKY20	kin28-taf1-AA plus rapamycin	Rpb1	2016-09-01
Kin28-Rpb3 anchor away	EKY23	kin28-rpb3-AA plus rapamycin	Med18	2016-09-01
	EKY23	kin28-rpb3-AA plus rapamycin	Med18	2018-04-01
	EKY23	kin28-rpb3-AA plus rapamycin	Med18	2018-07-01
	EKY24	kin28-rpb3-AA plus rapamycin	Med15	2016-09-01
	EKY24	kin28-rpb3-AA plus rapamycin	Med15	2018-08-01
